# Supplementary material
Source: Springer Nature journal article supplement (https://www.springermedizin.de/resource/supplementary/12967_2010_671_MOESM2_ESM.pdf/9577074)

# Tubular degeneration and tubulointerstitial fibrosis in CKD

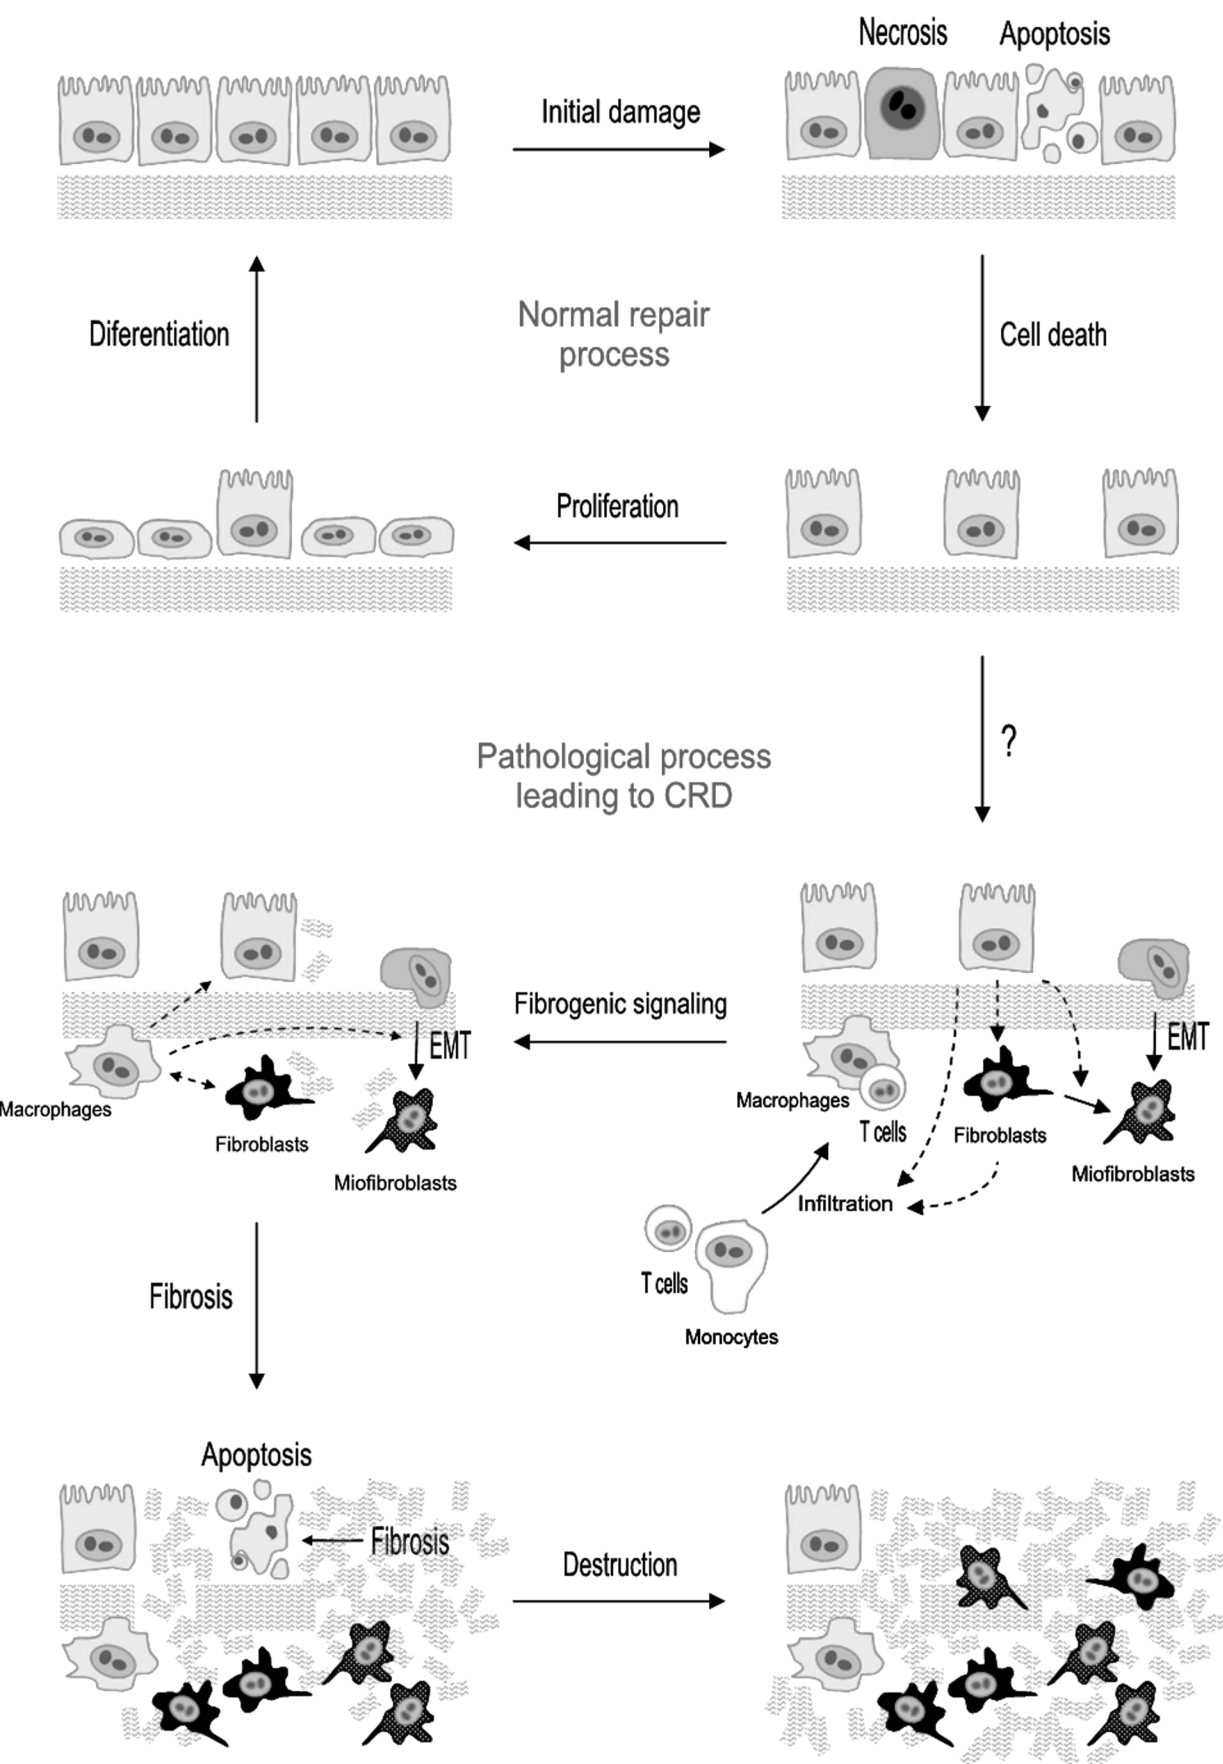

Supplement: MOESM2 [file 9577074]
